# Supplementary material for: Changing the π-bridge from thiophene to thieno[3,2-b]thiophene for the D–π–A type polymer enables high performance fullerene-free organic solar cells
Source: Royal Society of Chemistry journal article supplement (doi:10.1039/c9cc02904d), 2019-01-01
Supplement: c9cc02904d1.pdf [file c9cc02904d1.pdf]

## Supporting information

### **Changing the $\pi$ -bridge from thiophene to thieno[3,2-b]thiophene for D- $\pi$ -A type polymer enables high performance fullerene-free organic solar cells**

*You Chen<sup>1,2</sup>, Yangfang Geng<sup>1</sup>, Ailing Tang<sup>1</sup>, Xiaochen Wang<sup>1</sup>, Yanming Sun<sup>4</sup>, Erjun Zhou<sup>\*1, 3</sup>*

<sup>1</sup>CAS Key Laboratory of Nanosystem and Hierarchical Fabrication, CAS Center for Excellence in Nanoscience, National Center for Nanoscience and Technology, Beijing 100190, China.

<sup>2</sup>Center of Materials Science and Optoelectronics Engineering, University of Chinese Academy of Sciences, Beijing 100049, China.

<sup>3</sup>Henan Institutes of Advanced Technology, Zhengzhou University, Zhengzhou 450003, China.

<sup>4</sup>School of Chemistry, Beihang University, Beijing 100191, China

E-mail: [zhouej@nanoctr.cn](mailto:zhouej@nanoctr.cn)

#### **Materials and Synthesis.**

**Materials.** All Chemicals and solvents were reagent grades and purchased from Alfa, Aldrich, TCI, Beijing Chemical Plant or other chemical companies and used without further purification.

#### **Measurements and characterizations**

UV-vis spectra were identified with a Lambda 950 spectrophotometer. The J-V curves were measured in air with a Keithley 2420 source measure unit. The photocurrent was obtained under illumination using an Oriel Newport 150W solar simulator (AM 1.5G), and the light intensity was calibrated with a Newport reference detector (Oriel PN 91150 V). The EQE measurements of the devices were performed in air with an Oriel Newport system (Model 66902). The thickness of the active layer was measured on a Kla-TencorAlpha-StepD-120 Stylus Profiler. The thickness of the

J52-FS: Y6 and PE2: Y6 based films are estimated to be 100 and 110 nm, respectively. AFM images were obtained on a Multimode Digital Instrument (D3100) in ScanAsyst mode. Two-dimensional grazing incidence X-ray diffraction (2D-GIXD) analyses were measured at the XEUSS SAXS/WAXS equipment. The data were obtained with an area Pilatus 100k detector with a resolution of  $195 \times 487$  pixels ( $0.172 \text{ mm} \times 0.172 \text{ mm}$ ). The X-ray wavelength was  $1.54 \text{ \AA}$ , and the incidence angle was  $0.2^\circ$ . The samples were spin-coated onto the PEDOT:PSS/Si substrate.

### **Photovoltaic device fabrication**

The PSC devices were fabricated with a configuration of ITO/ PEDOT: PSS/ active layer/ Ca/ Al. A thin layer of PEDOT: PSS (40 nm, Baytron PH1000) was spin-cast on pre-cleaned ITO-coated glass at 3000 rpm, 30s. After baking at  $150^\circ\text{C}$  for 15 min, the substrates were transferred into glovebox. Optimized devices were prepared under the following conditions. The Donor: Acceptor (D: A) ratio of 1:1.2 (w/w) was dissolved in chloroform (CF) with a total concentration of 18 mg/mL for J52-FS: Y6 and PE2: Y6 with the solvent additive of 1-chloronaphthalene (CN) (0.5%, v/v). Then they were stirred for 1 hour at  $40^\circ\text{C}$ . Afterwards, the active layers were spin-coated from the above solution with a speed of 3000 rpm for 30s onto the PEDOT: PSS layer. The thickness of the photoactive layer is in the range of 100-110 nm. Subsequently, J52-FS: Y6 devices were annealed at  $110^\circ\text{C}$  for 10min. For PE2: Y6, SVA was first carried out in glovebox that the blend films were loaded in the middle of Petri dish containing 200  $\mu\text{L}$  chloroform for 60 s, and then were annealed at  $110^\circ\text{C}$  for 10min. Finally, a Ca (20 nm)/Al (80nm) metal top electrode was thermal evaporated onto the active layer under about  $3 \times 10^{-4} \text{ Pa}$ . The active area of the device was  $0.04 \text{ cm}^2$  defined by shadow mask.

### **Carrier Mobilities**

The carrier mobilities of the polymer was investigated by the space charge limited current (SCLC) method. The hole mobility of the blend films was measured with the device structure of ITO/ PEDOT:PSS/ active layer/Au (80 nm) while the electron mobility of the blends was measured with the device structure of ITO/ TiOx/ active layer/ Al (80 nm).

The SCLC model is described by modified Mott-Gurney law:

$$J = \frac{9}{8} \epsilon_0 \epsilon_r \mu \frac{V^2}{L^3}$$

where  $J$  stands for current density,  $\epsilon_0$  is the permittivity of free space ( $8.85 \times 10^{-12}$  C V<sup>-1</sup> m<sup>-1</sup>),  $\epsilon_r$  is the relative dielectric constant of the transport medium (assuming that of 3.0),  $\mu$  is the carrier mobility, and  $L$  is the thickness of the active layer.  $V$  is the internal potential in the device, and  $V = V_{\text{app}} - V_{\text{bi}}$ , where  $V_{\text{app}}$  is the voltage applied to the device, and  $V_{\text{bi}}$  is the built-in voltage resulting from the relative work function difference between the two electrodes (the  $V_{\text{bi}}$  values of hole-only and electron-only devices were all selected as 0 V).

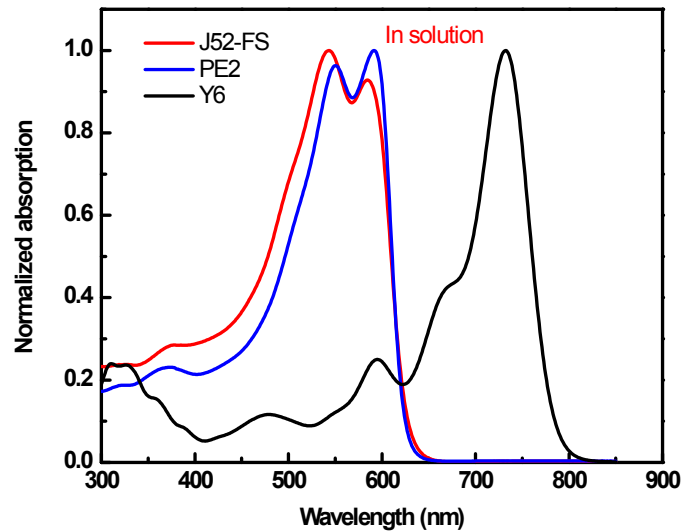

**Figure S1.** Normalized absorption spectra of polymers and Y6 in CF solution.

**Table S1.** Optical and electrochemical properties of the two polymers and Y6.

| Compounds     | $\lambda_{\text{max}}(\text{nm})$ | $\lambda_{\text{onset}}(\text{nm})$ | $E_g^{\text{opt}}(\text{eV})$ | $E_{\text{HOMO}}(\text{eV})$ | $E_{\text{LUMO}}(\text{eV})$ |
|---------------|-----------------------------------|-------------------------------------|-------------------------------|------------------------------|------------------------------|
| <b>J52-FS</b> | 542                               | 642                                 | 1.93                          | -5.32                        | -3.39                        |
| <b>PE2</b>    | 545                               | 637                                 | 1.95                          | -5.41                        | -3.53                        |
| <b>Y6</b>     | 821                               | 931                                 | 1.33                          | -5.65                        | -4.10                        |

**Table S2.** The photovoltaic performance of J52-FS: Y6 (1: 1.2, w/w) and PE2: Y6 (1: 1.2, w/w) under different total concentration and spin-coating speed. (Annealed at 110°C for 10 min.)

| Devices     | Total concentration (mg/mL) | rpm         | V <sub>oc</sub> (V) | J <sub>sc</sub> (mA/cm <sup>2</sup> ) | FF          | PCE (%)      |
|-------------|-----------------------------|-------------|---------------------|---------------------------------------|-------------|--------------|
| J52-FS : Y6 | 14                          | 2000        | 0.80                | 20.28                                 | 0.59        | 9.57         |
|             |                             | <b>2500</b> | <b>0.80</b>         | <b>19.42</b>                          | <b>0.63</b> | <b>9.79</b>  |
|             |                             | 2800        | 0.80                | 17.07                                 | 0.64        | 8.74         |
|             | 16                          | <b>2000</b> | <b>0.81</b>         | <b>22.44</b>                          | <b>0.57</b> | <b>10.36</b> |
|             |                             | 2500        | 0.81                | 19.92                                 | 0.60        | 9.68         |
|             | 18                          | 2500        | 0.81                | 22.86                                 | 0.56        | 10.37        |
|             |                             | <b>3000</b> | <b>0.81</b>         | <b>22.92</b>                          | <b>0.57</b> | <b>10.58</b> |
|             |                             | 3500        | 0.80                | 20.15                                 | 0.58        | 9.35         |
|             | PE2: Y6                     | 16          | 1800                | 0.83                                  | 21.12       | 0.68         |
| 2000        |                             |             | 0.83                | 19.67                                 | 0.70        | 11.43        |
| <b>2500</b> |                             |             | <b>0.83</b>         | <b>22.29</b>                          | <b>0.70</b> | <b>12.95</b> |
| 18          |                             | 2000        | 0.82                | 23.17                                 | 0.68        | 12.92        |
|             |                             | 2500        | 0.83                | 23.07                                 | 0.69        | 13.21        |
|             |                             | <b>3000</b> | <b>0.83</b>         | <b>23.21</b>                          | <b>0.69</b> | <b>13.29</b> |

**Table S3.** The photovoltaic performance of J52-FS: Y6 (1: 1.2, w/w) under different solvent additives (0.5 vol%) at a total concentration of 18mg/mL. (Annealed at 110°C for 10 min.)

| additives | V <sub>oc</sub> (V) | J <sub>sc</sub> (mA/cm <sup>2</sup> ) | FF   | PCE (%) |
|-----------|---------------------|---------------------------------------|------|---------|
| CN        | 0.81                | 21.39                                 | 0.59 | 10.22   |
| CP        | 0.81                | 22.05                                 | 0.57 | 10.18   |
| DPE       | 0.80                | 19.40                                 | 0.58 | 9.00    |

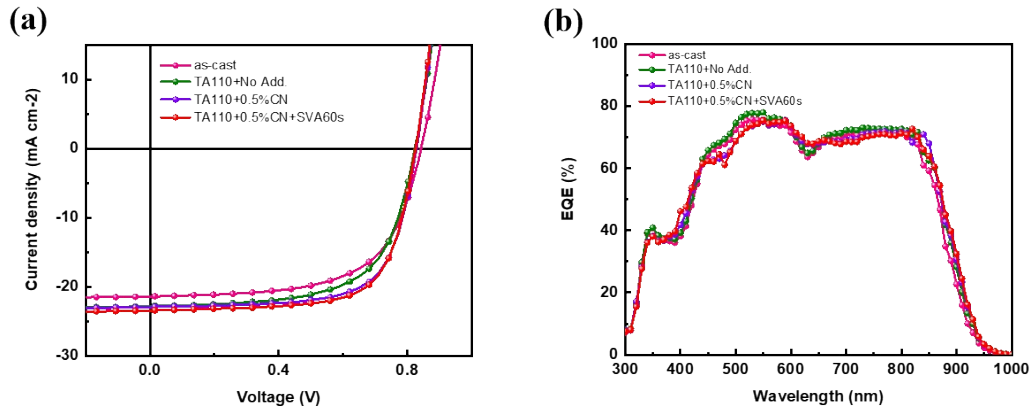

**Figure S2.** (a)  $J$ - $V$  curves of the PE2: Y6 under different fabrication conditions. (b) EQE curves of the corresponding devices.

**Table S4.** The photovoltaic performance of PE2: Y6 under different fabrication conditions.

| Conditions                       | $V_{oc}$ (V) | $J_{sc}$ (mA/cm <sup>2</sup> ) | FF          | PCE (%)      |
|----------------------------------|--------------|--------------------------------|-------------|--------------|
| As-cast                          | 0.84         | 21.35                          | 0.63        | 11.30        |
| <sup>a</sup> TA110+No Add.       | 0.82         | 22.94                          | 0.63        | 12.04        |
| TA110+0.5%CN                     | 0.83         | 23.21                          | 0.69        | 13.29        |
| <sup>b</sup> TA110+0.5%CN+SVA60s | <b>0.83</b>  | <b>23.24</b>                   | <b>0.70</b> | <b>13.50</b> |

<sup>a</sup> TA110 represented for thermal annealing at 110°C, No Add. namely no additives.

<sup>b</sup> SVA60s means the blend films were treated by solvent vapor annealing for 60s.

**Table S5.** The photovoltaic performance of PE2: Y6 (1: 1.2, w/w, 18mg/mL) under different vol% CN at 110°C, 10 min thermal annealing.

| Additive (vol% CN) | $V_{oc}$ (V) | $J_{sc}$ (mA/cm <sup>2</sup> ) | FF   | PCE (%) |
|--------------------|--------------|--------------------------------|------|---------|
| 0                  | 0.82         | 22.94                          | 0.64 | 12.04   |
| 0.3%               | 0.84         | 22.30                          | 0.68 | 12.74   |
| 0.5%               | 0.83         | 23.21                          | 0.69 | 13.29   |
| 0.8%               | 0.82         | 23.26                          | 0.68 | 12.97   |
| 1.0%               | 0.82         | 22.07                          | 0.70 | 12.67   |

**Table S6.** The photovoltaic performance of PE2: Y6 (1: 1.2, w/w, 18mg/mL) under different thermal annealing temperature.

| TA (°C) | $V_{oc}$ (V) | $J_{sc}$ (mA/cm <sup>2</sup> ) | FF | PCE (%) |
|---------|--------------|--------------------------------|----|---------|
|---------|--------------|--------------------------------|----|---------|

|     |      |       |      |       |
|-----|------|-------|------|-------|
| a-- | 0.84 | 21.35 | 0.63 | 11.30 |
| 100 | 0.84 | 21.24 | 0.69 | 12.31 |
| 110 | 0.83 | 23.21 | 0.69 | 13.29 |
| 130 | 0.81 | 20.48 | 0.70 | 11.61 |
| 150 | 0.79 | 21.30 | 0.68 | 11.44 |

<sup>a</sup> as-cast.

**Table S7.** The photovoltaic performance of PE2: Y6 (1: 1.2, w/w, 18mg/mL) under different SVA time followed by TA110°C, 10min.

| SVA(s) | V <sub>oc</sub> (V) | J <sub>sc</sub> (mA/cm <sup>2</sup> ) | FF   | PCE (%) |
|--------|---------------------|---------------------------------------|------|---------|
| 0      | 0.83                | 23.21                                 | 0.69 | 13.29   |
| 30     | 0.83                | 21.42                                 | 0.69 | 12.27   |
| 60     | 0.83                | 23.24                                 | 0.70 | 13.50   |
| 90     | 0.82                | 20.51                                 | 0.70 | 11.70   |
| 120    | 0.82                | 22.78                                 | 0.69 | 12.89   |

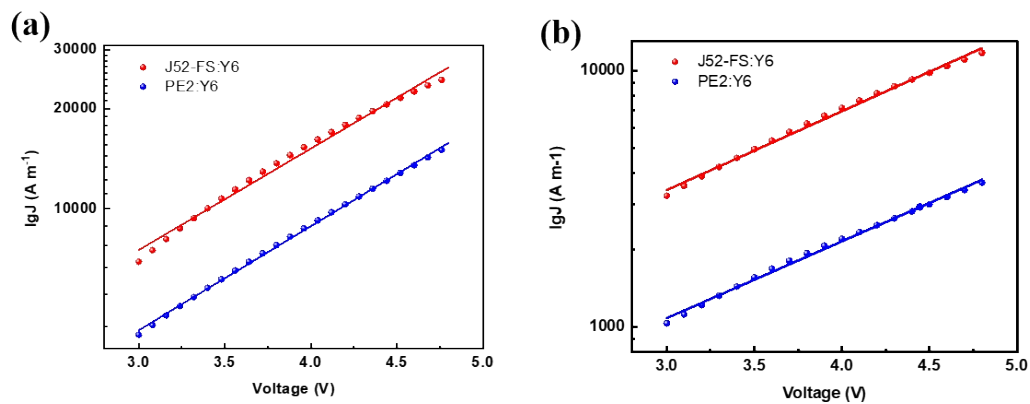

**Figure S3.**  $J$ - $V$  semi-logarithm characteristics of the (a) hole-only and (b) electron-only devices.
